# Supplementary material for: Green tea infusion protects against alcoholic liver injury by attenuating inflammation and regulating the PI3K/Akt/eNOS pathway in C57BL/6 mice
Source: Royal Society of Chemistry journal article supplement (doi:10.1039/c7fo00791d), 2017-01-01
Supplement: c7fo00791d1.pdf [file c7fo00791d1.pdf]

## Supplementary Figures

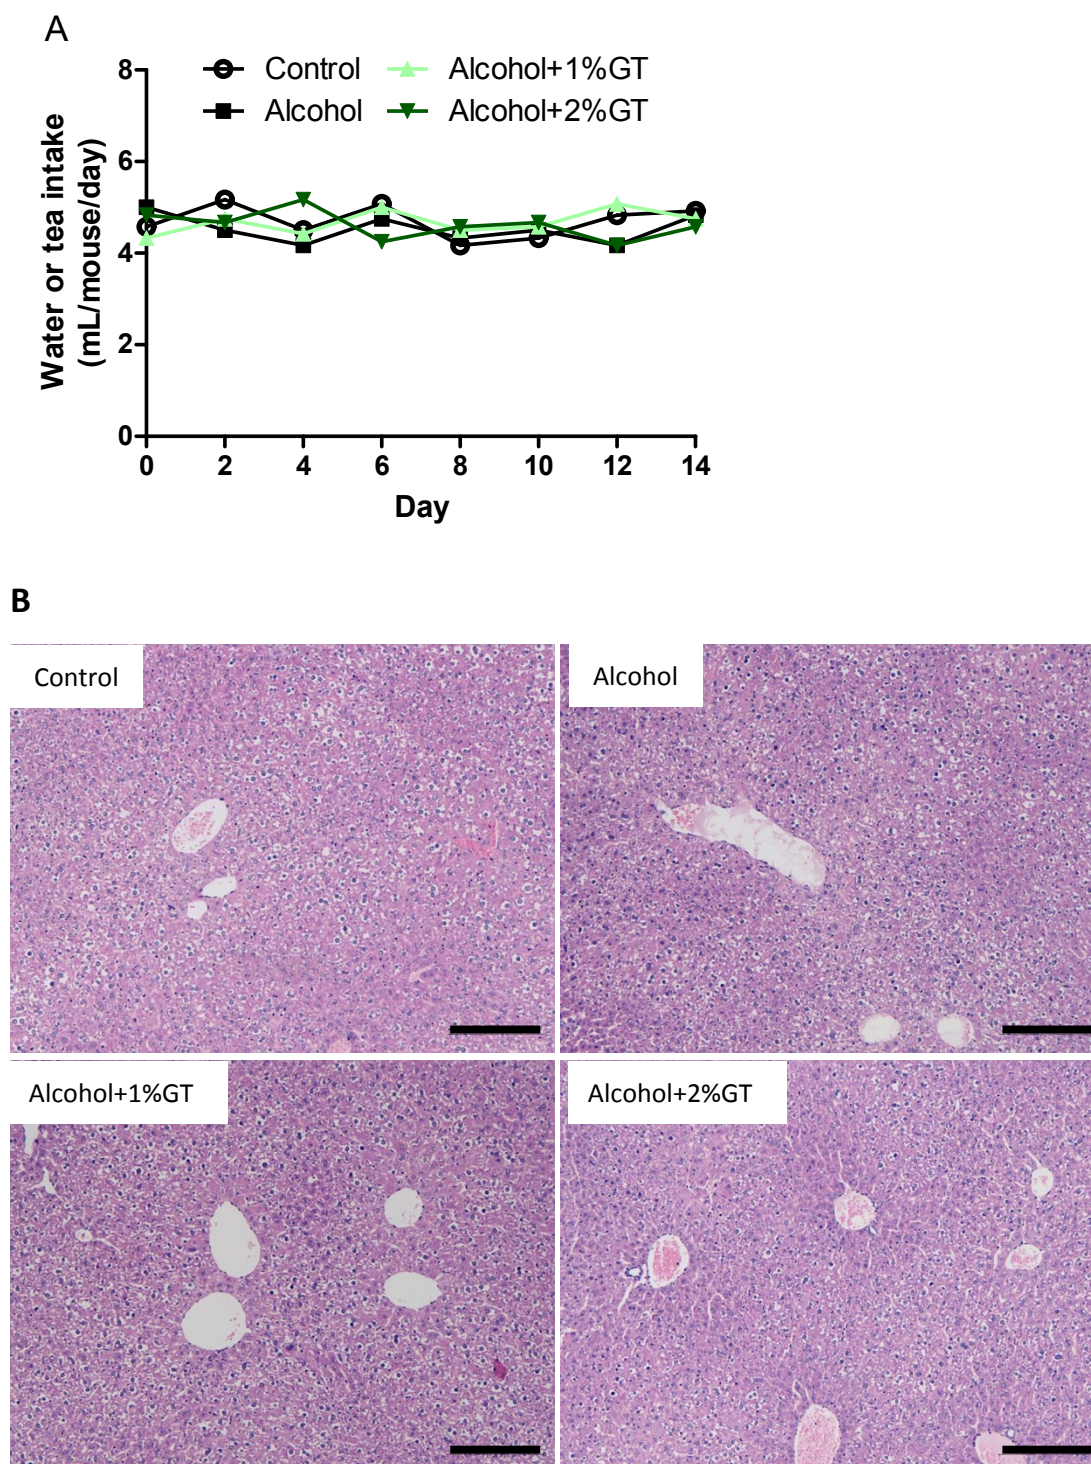

**Supplementary Figure. 1** Water or tea intake and liver histopathological observation after exposure to alcohol. The mice in each group were allowed free access to green tea infusion (1:50 or 1:100, w/v) or water for 14 consecutive days. In three ethanol groups, ethanol (50% v/v, 6 g/kg) was administered to the mice intragastrically once a day over a 14-day period. (A) Water or tea consumption. (B) Histological investigations (H&E×100).
